# Supplementary material for: Synthesis and Biological Testing of Novel Glucosylated Epigallocatechin Gallate (EGCG) Derivatives
Source: PubMed Central journal article supplement (PMC6274015; doi:10.3390/molecules21050620), 2016-05-11
Supplement: molecules-21-00620-s001.pdf [file molecules-21-00620-s001.pdf]

# Supporting Materials: Synthesis and Biological Testing of Novel Glucosylated Epigallocatechin Gallate (EGCG) Derivatives

Xin Zhang, Jing Wang, Jiang-Miao Hu, Ye-Wei Huang, Xiao-Yun Wu, Cheng-Ting Zi, Xuan-Jun Wang, Jun Sheng

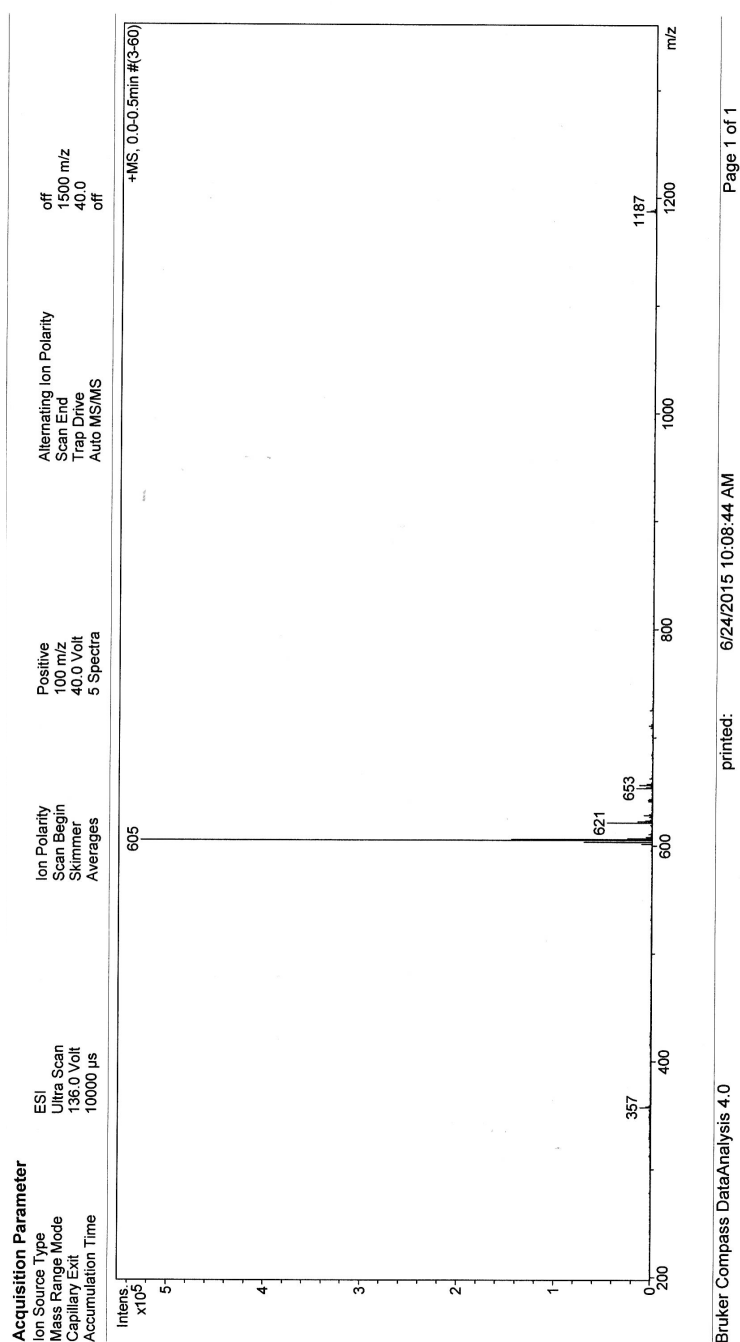

Figure S1. ESI MS of EGCG-G1 (2).

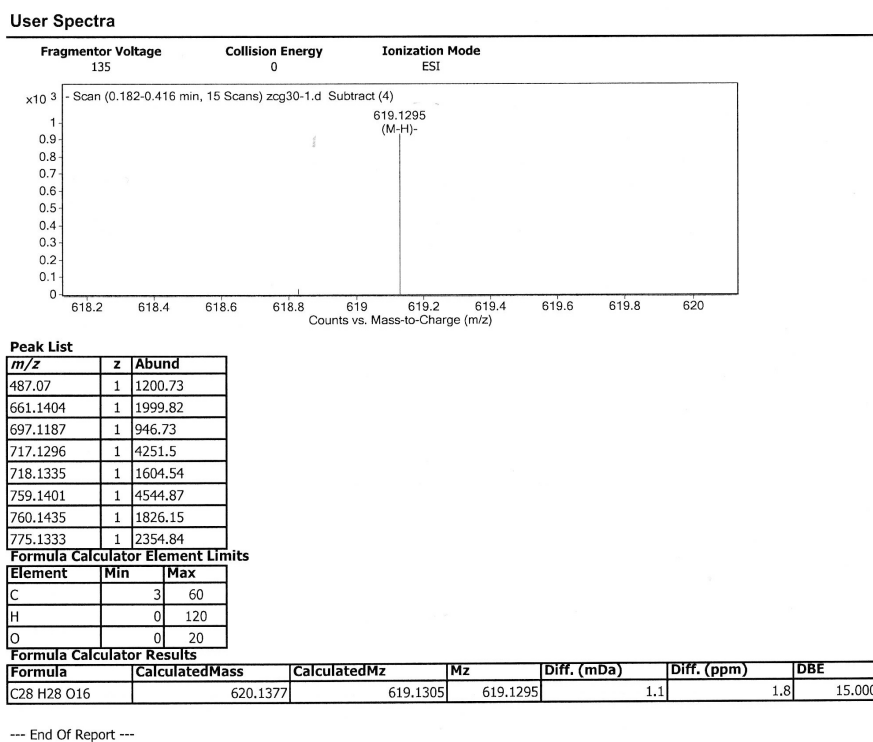

Figure S2. HRMS of EGCG-G1 (2).

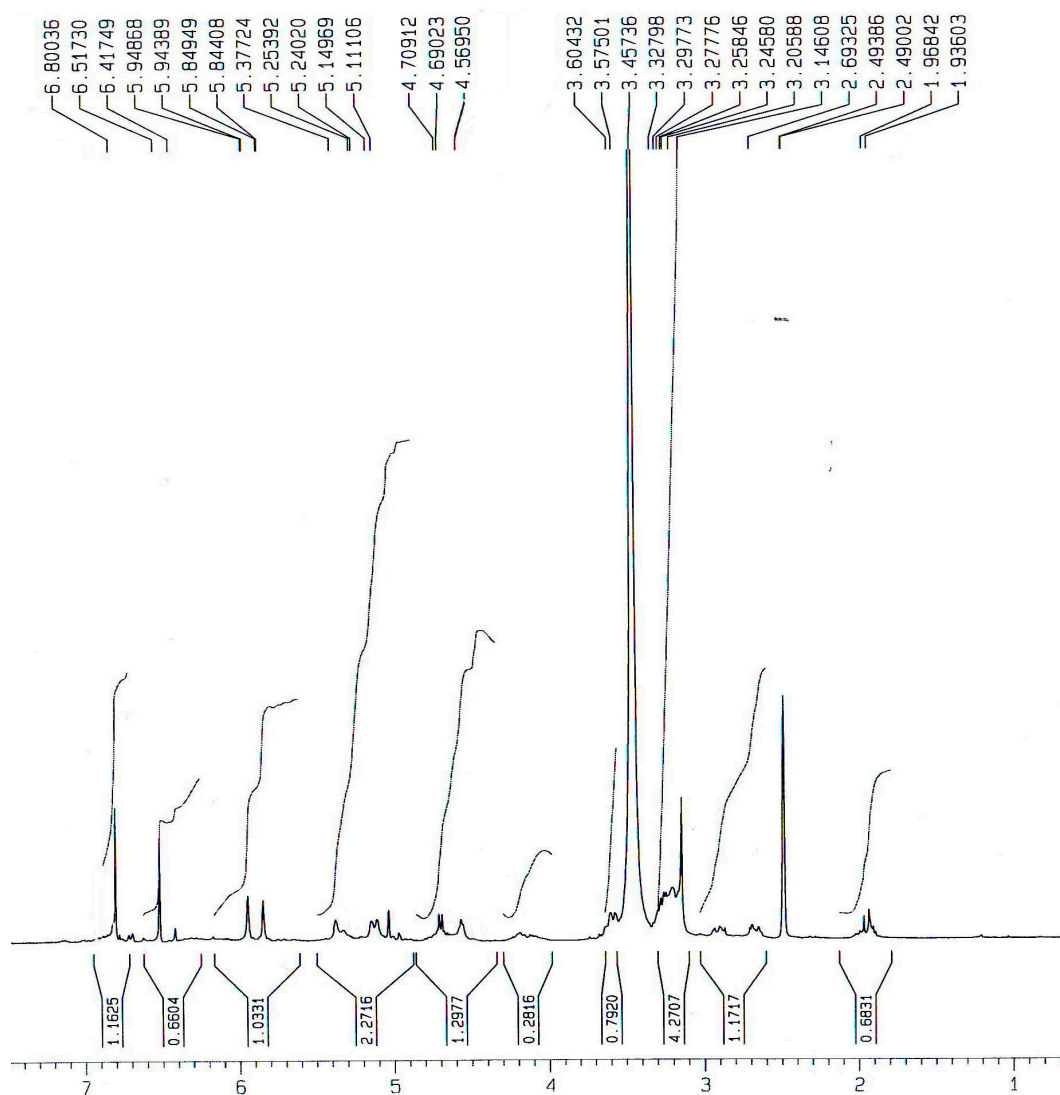Figure S3. <sup>1</sup>H-NMR of EGCG-G1 (2).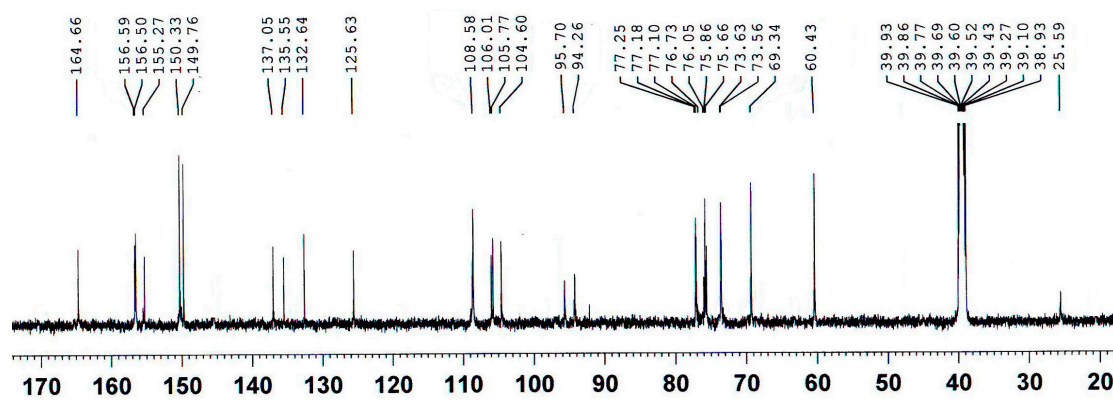Figure S4. <sup>13</sup>C-NMR of EGCG-G1 (2).

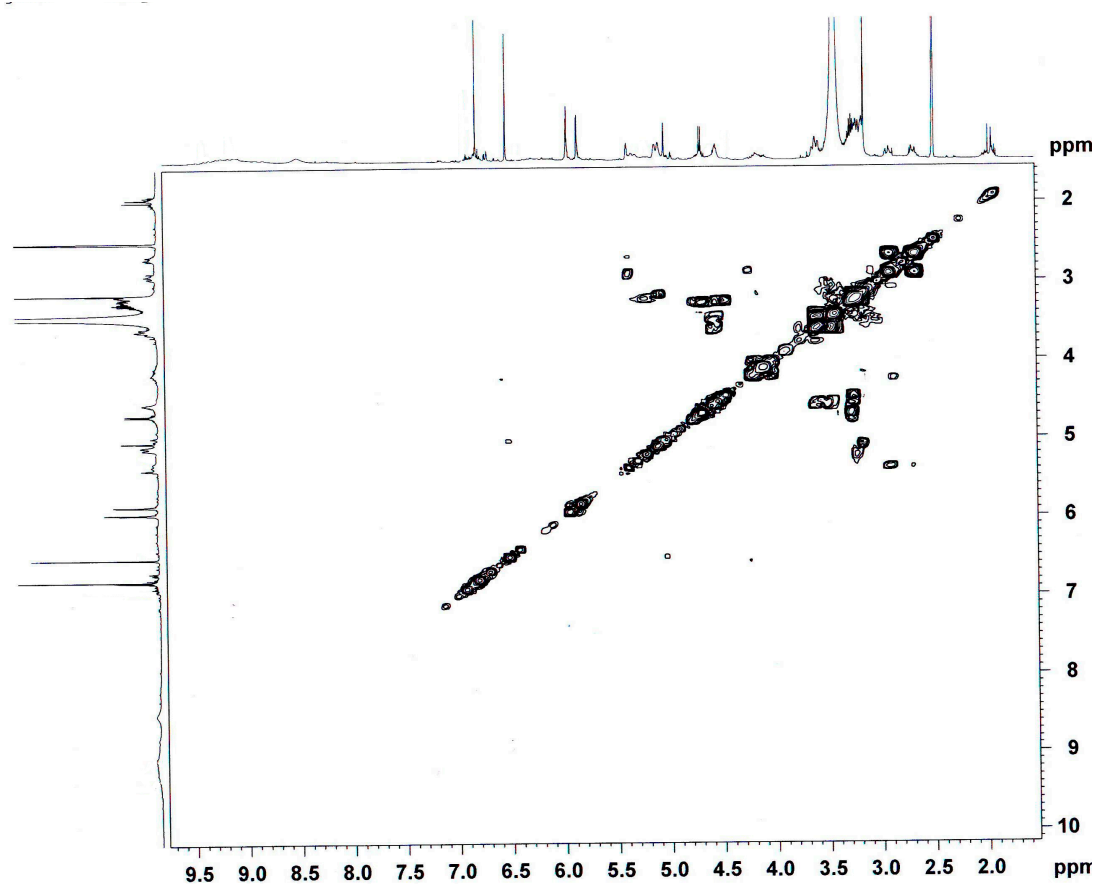

Figure S5. COSY of EGCG-G1 (2).

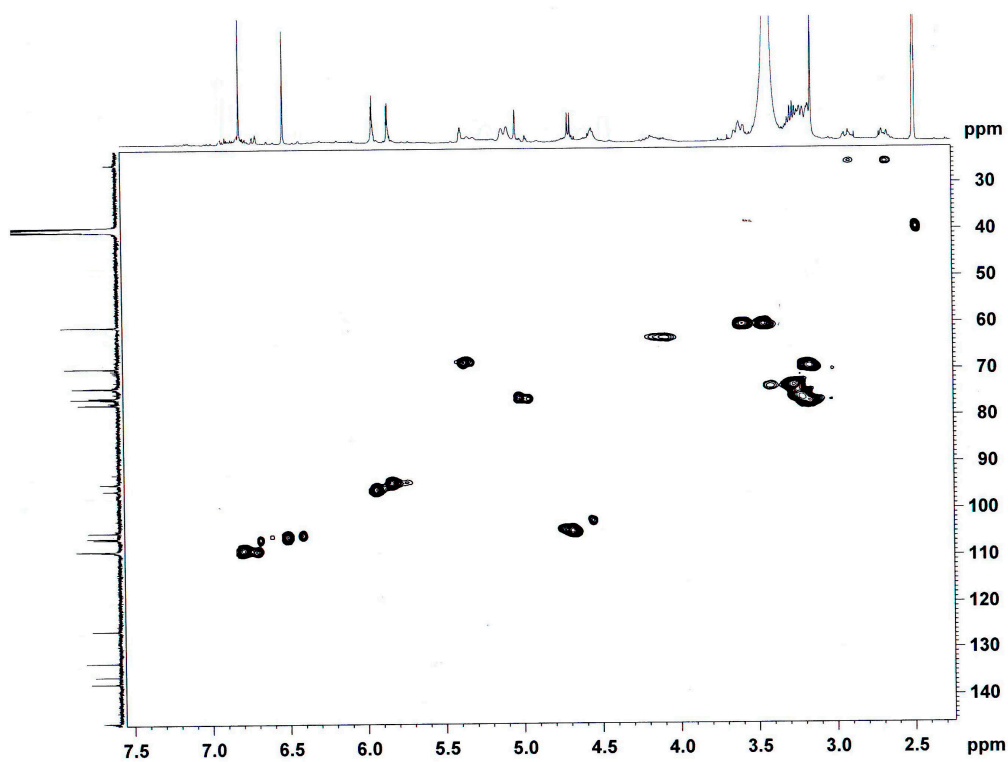

Figure S6. HSQC of EGCG-G1 (2).

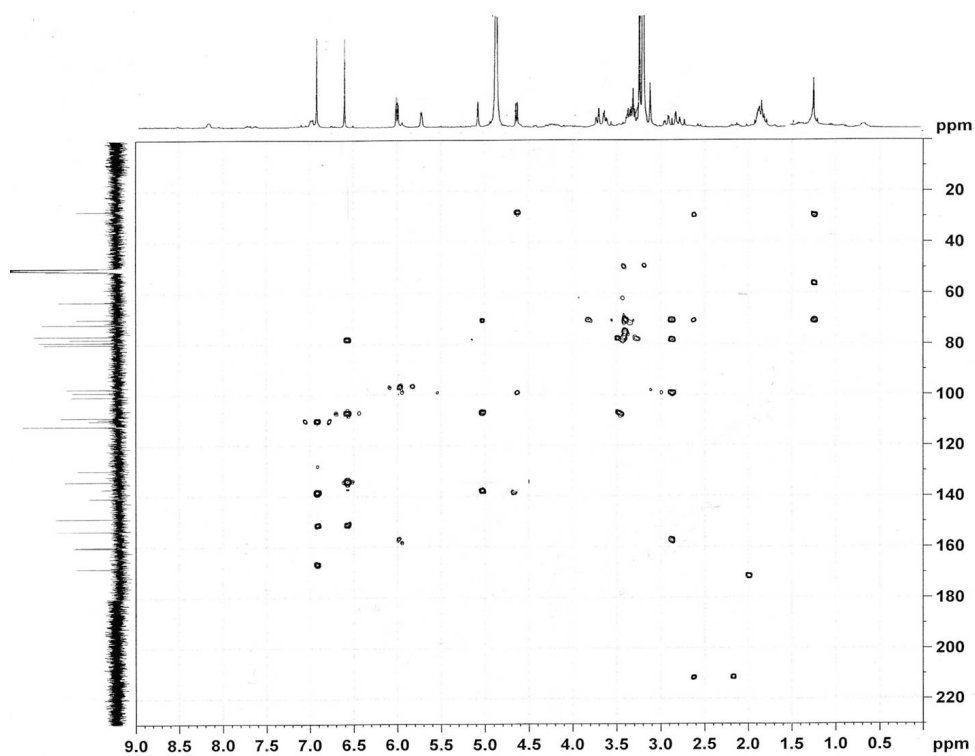

Figure S7. HMBC of EGCG-G1 (2).

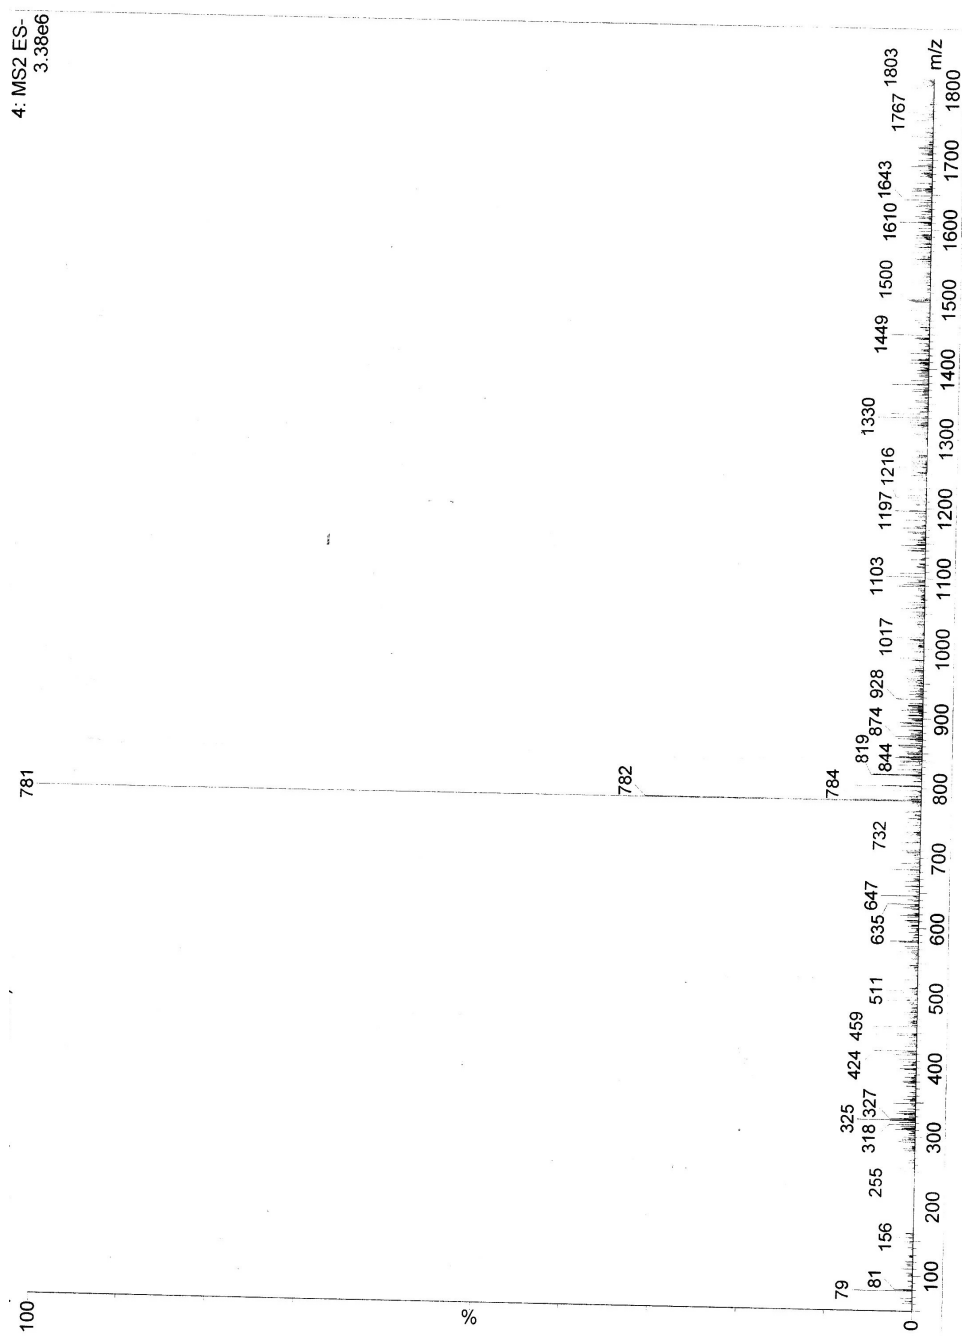

Figure S8. ESI MS of EGCG-G1 (3).

## User Spectra

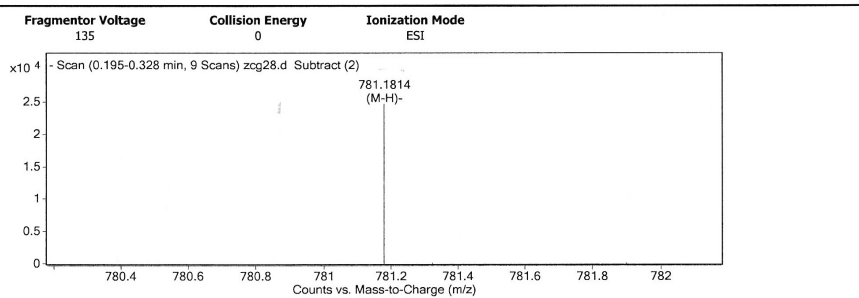

## Peak List

| m/z      | z | Abund    | Formula     | Ion    |
|----------|---|----------|-------------|--------|
| 781.1814 | 1 | 24798.21 | C34 H38 O21 | (M-H)- |
| 782.1845 | 1 | 9102.5   | C34 H38 O21 | (M-H)- |
| 817.1588 | 1 | 50449.92 |             |        |
| 818.1617 | 1 | 18442.21 |             |        |
| 819.1581 | 1 | 20595.71 |             |        |
| 895.1738 | 1 | 10107.69 |             |        |

## Formula Calculator Element Limits

| Element | Min | Max |
|---------|-----|-----|
| C       | 3   | 60  |
| H       | 0   | 120 |
| O       | 0   | 30  |

## Formula Calculator Results

| Formula     | CalculatedMass | CalculatedMz | Mz       | Diff. (mDa) | Diff. (ppm) | DBE     |
|-------------|----------------|--------------|----------|-------------|-------------|---------|
| C34 H38 O21 | 782.1906       | 781.1833     | 781.1814 | 1.9         | 2.5         | 16.0000 |

Figure S9. HRMS of EGCG-G2 (3).

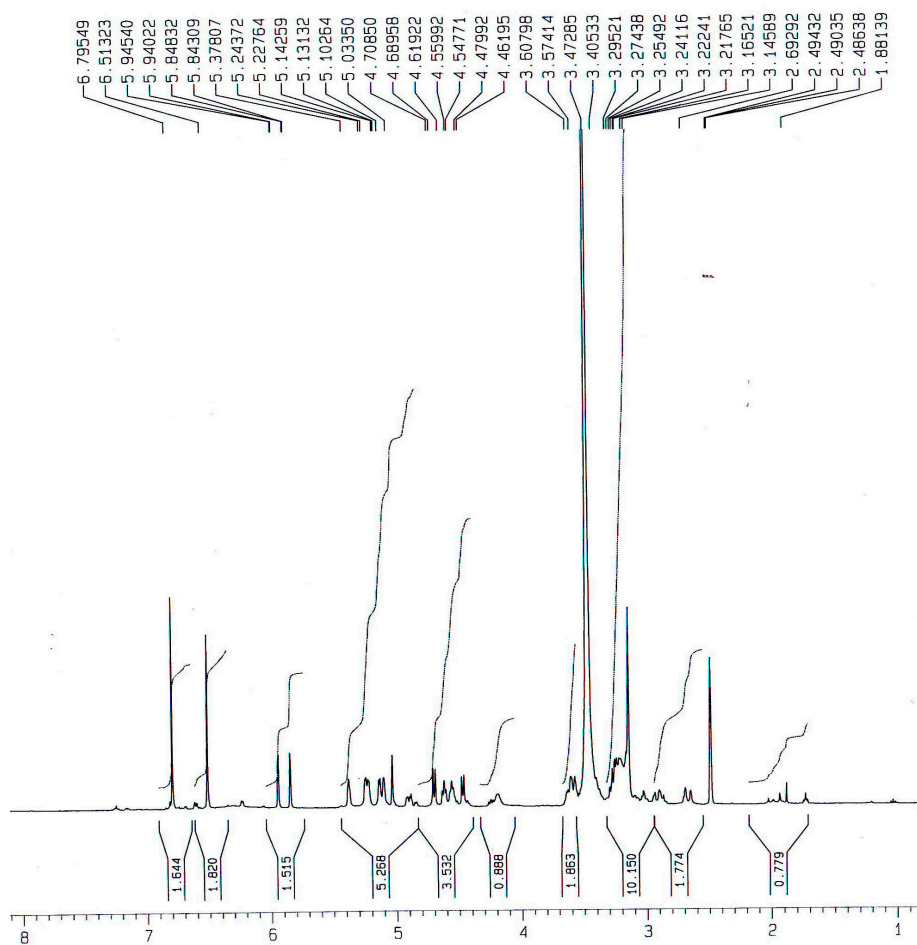Figure S10. <sup>1</sup>H-NMR of EGCG-G2(3).

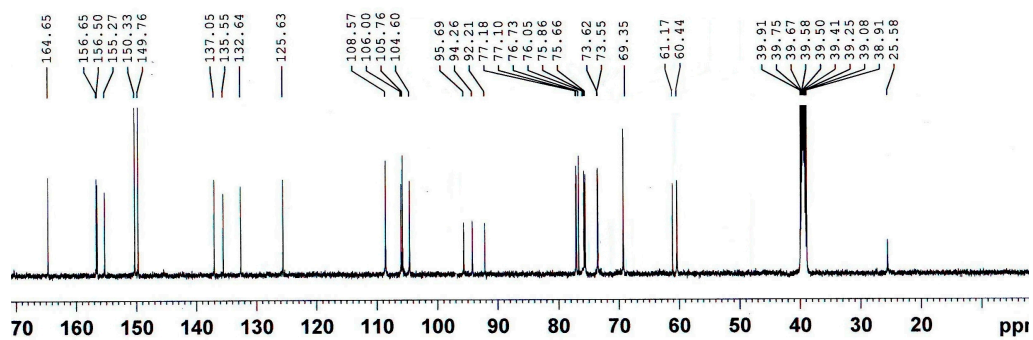Figure S11. <sup>13</sup>C-NMR of EGCG-G2 (3).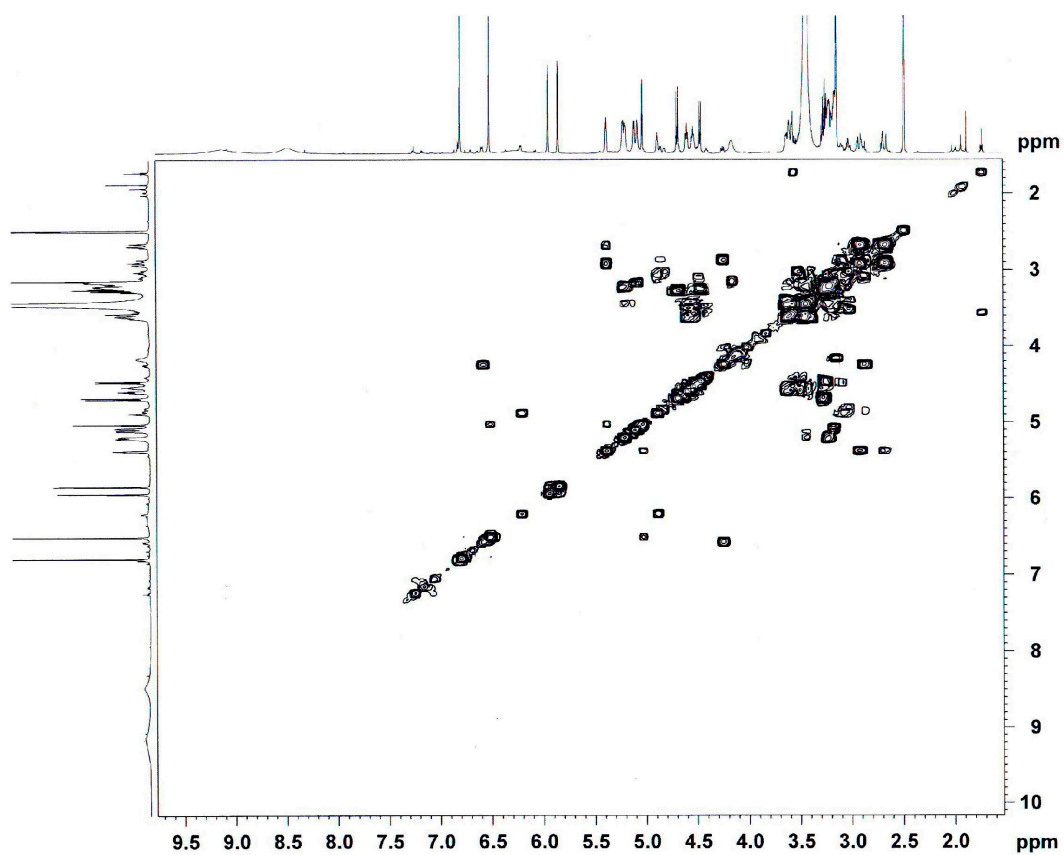

Figure S12. COSY of EGCG-G2 (3).



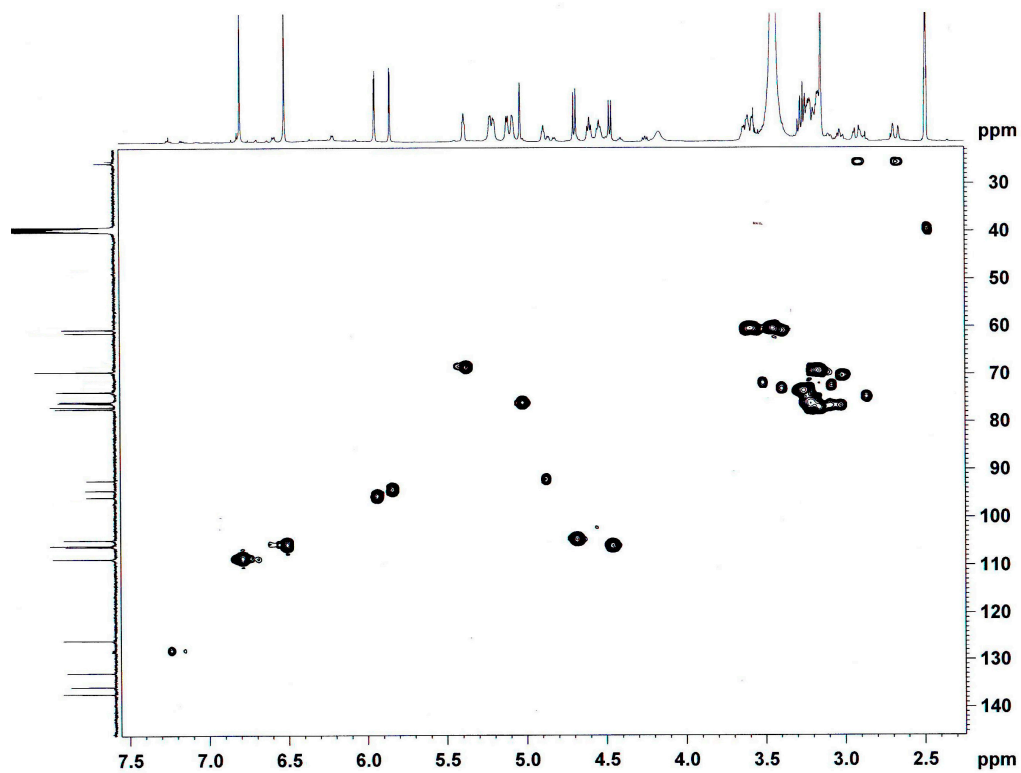

Figure S13. HSQC of EGCG-G2 (3).

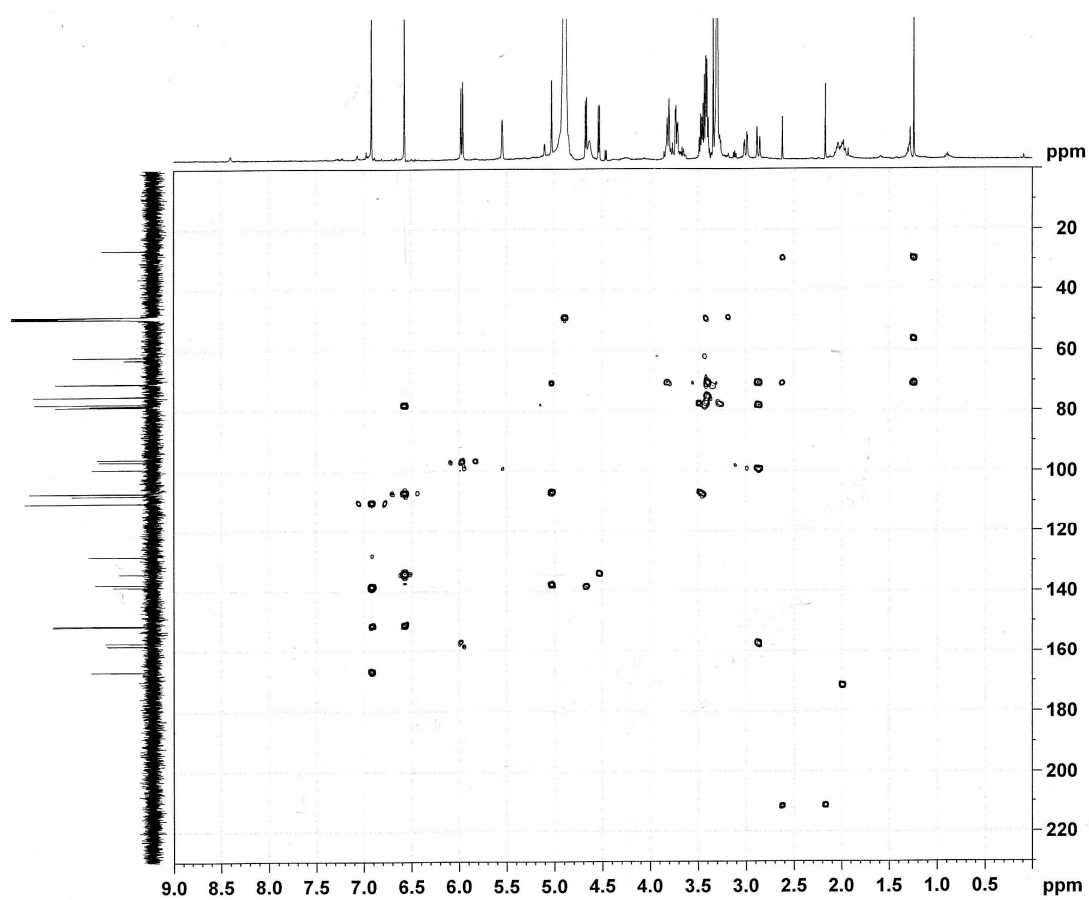

Figure S14. HMBC of EGCG-G2 (3).
